# Supplementary material
Source: PubMed Central journal article supplement (PMC4636215)
Supplement: NIHMS732908-supplement-1.pdf [file NIHMS732908-supplement-1.pdf]

## Supplementary Figure Legends

**Figure S1.** Effect of dietary suberoylanilide hydroxamic acid (SAHA) and/or dietary energy restriction (DER) on histone deacetylase (HDAC) and p53 acetylation in mammary carcinomas. The images shown are those directly acquired from the ChemiDoc workstation that is equipped with a CCD camera having a resolution of 1300 x 1030. A composite image of representative western blots of lysates of carcinomas from rats either control (CTL), SAHA, DER, SAHA+DER or SAHA+DER release. Some bands may appear over expressed in this composite photograph of representative bands from the western blot analysis, the actual images evaluated in the ChemiDoc were the linear range based on the threshold and the algorithm used in the Quality one software.

**Figure S2.** Effect of dietary suberoylanilide hydroxamic acid (SAHA) and/or dietary energy restriction (DER) on cell proliferation and apoptosis in mammary carcinomas. The images shown are those directly acquired from the ChemiDoc workstation that is equipped with a CCD camera having a resolution of 1300 x 1030. A composite image of representative western blots of lysates of carcinomas from rats either control (CTL), SAHA, DER, SAHA+DER or SAHA+DER release. Some bands may appear over expressed in this composite photograph of representative bands from the western blot analysis, the actual images evaluated in the ChemiDoc were the linear range based on the threshold and the algorithm used in the Quality one software.

**Figure S3.** Effect of dietary suberoylanilide hydroxamic acid (SAHA) and/or dietary energy restriction (DER) on cellular processes regulating mTOR pathway in mammary carcinomas. The images shown are those directly acquired from the ChemiDoc workstation that is equipped with a CCD camera having a resolution of 1300 x 1030. A composite image of representative

western blots of lysates of carcinomas from rats either control (CTL), SAHA, DER, SAHA+DER or SAHA+DER release. Some bands may appear over expressed in this composite photograph of representative bands from the western blot analysis, the actual images evaluated in the ChemiDoc were the linear range based on the threshold and the algorithm used in the Quality one software.
