# Supplementary material
Source: PubMed Central journal article supplement (PMC4636215)

Figure S2

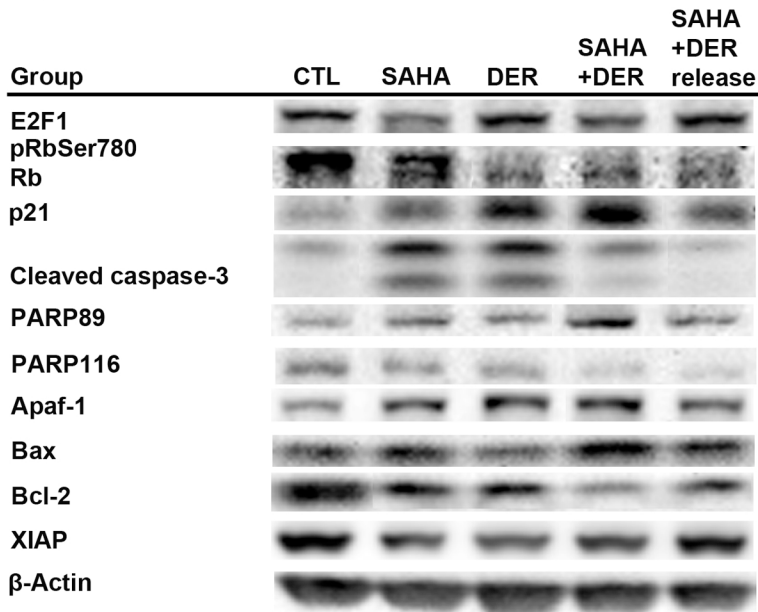

Supplement: NIHMS732908-supplement-3.pdf [file NIHMS732908-supplement-3.pdf]

Figure S3

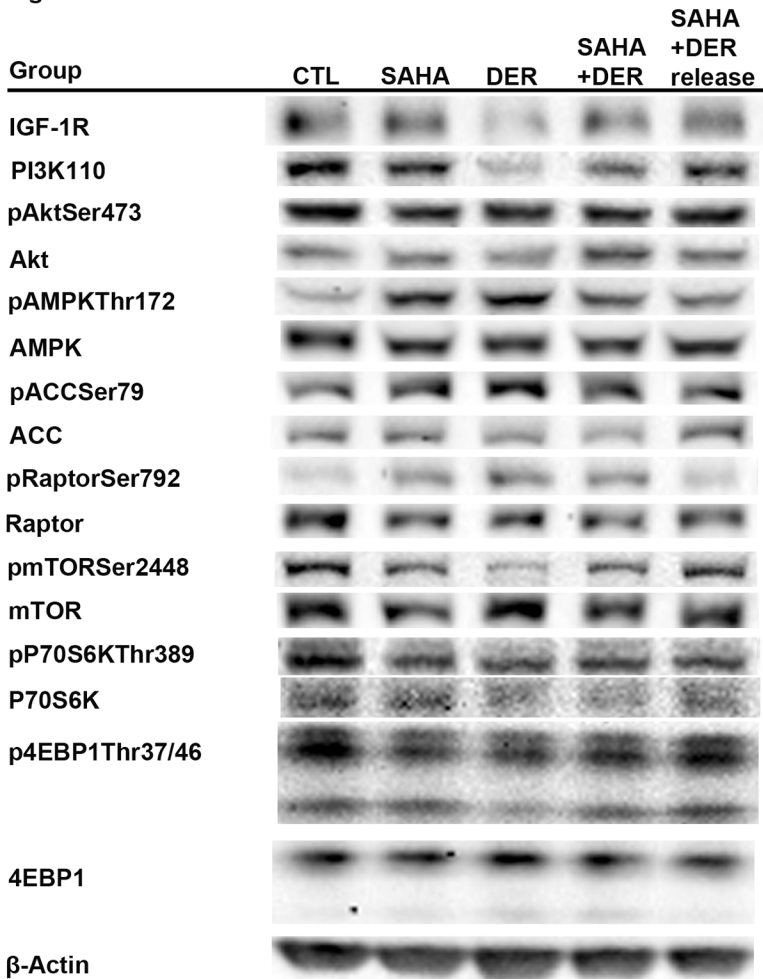

Supplement: NIHMS732908-supplement-4.pdf [file NIHMS732908-supplement-4.pdf]
